# Supplementary material for: A highly efficient transition metal oxide layer for hole extraction and transport in inverted polymer bulk heterojunction solar cells
Source: Royal Society of Chemistry journal article supplement (doi:10.1039/c3ta10863e), 2013-01-01
Supplement: c3ta10863e.pdf [file c3ta10863e.pdf]

## Electronic Supporting Information (ESI)

# A highly efficient transition metal oxide layer for hole extraction and transport in inverted polymer bulk heterojunction solar cells

Raju Lampande,<sup>a</sup> Gyeong Woo Kim,<sup>a</sup> Julien Boizot,<sup>a</sup> Young Jae Kim,<sup>a</sup> Ramchandra Pode,<sup>b</sup> and Jang Hyuk Kwon<sup>\*a</sup>

<sup>a</sup> Department of Information Display, Kyung Hee University, Dongdaemoon-gu, Seoul 130-701, Republic of Korea

<sup>b</sup> Department of Physics, Kyung Hee University, Dongdaemoon-gu, Seoul 130-701, Republic of Korea.

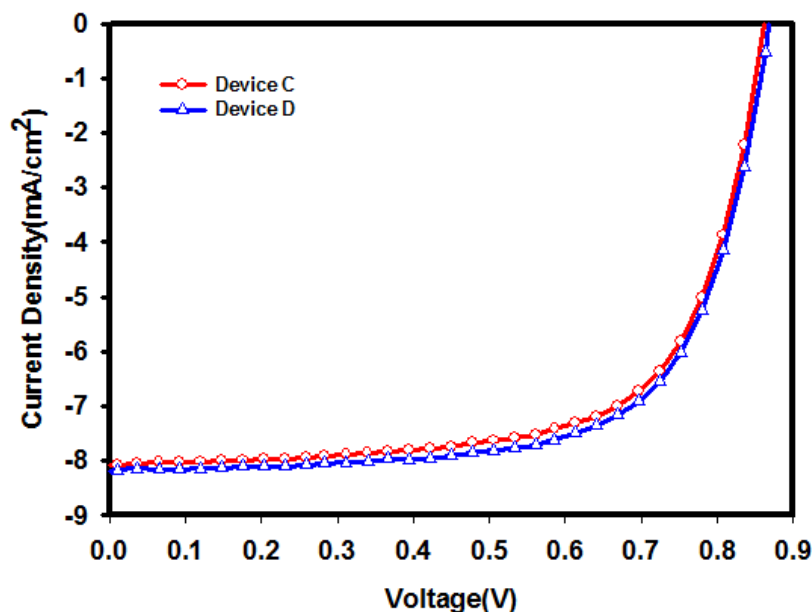

Fig. S1 Current Density versus Voltage characteristics for the following devices:

Device C: Glass/ITO/ZnO(~30nm)/P3HT:ICBA(~80nm)/MoO<sub>3</sub>(10nm)/Al(100nm);

Device D: Glass/ITO/ZnO(~30nm)/P3HT:ICBA (~80nm)/WO<sub>3</sub> (5nm)/Al (100nm)

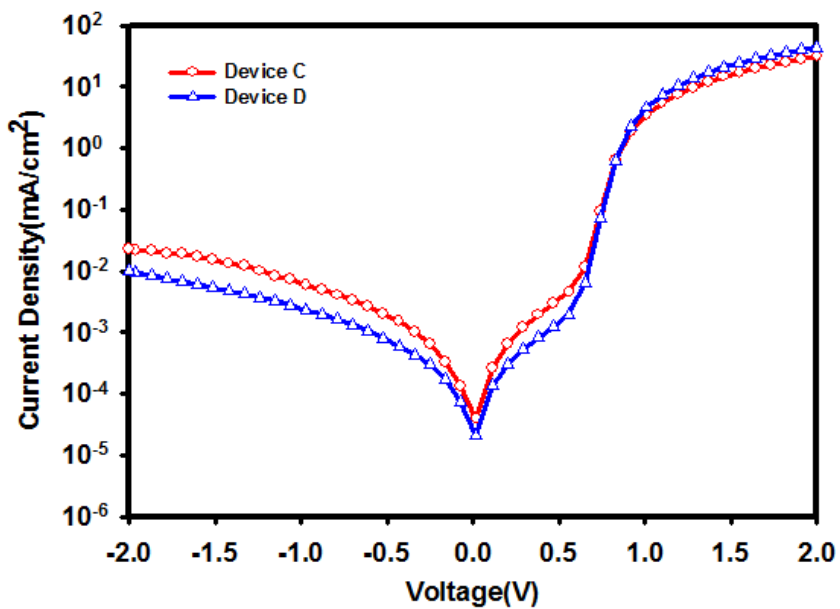

Fig. S2 Current Density versus Voltage characteristics for Device C and Device D

5

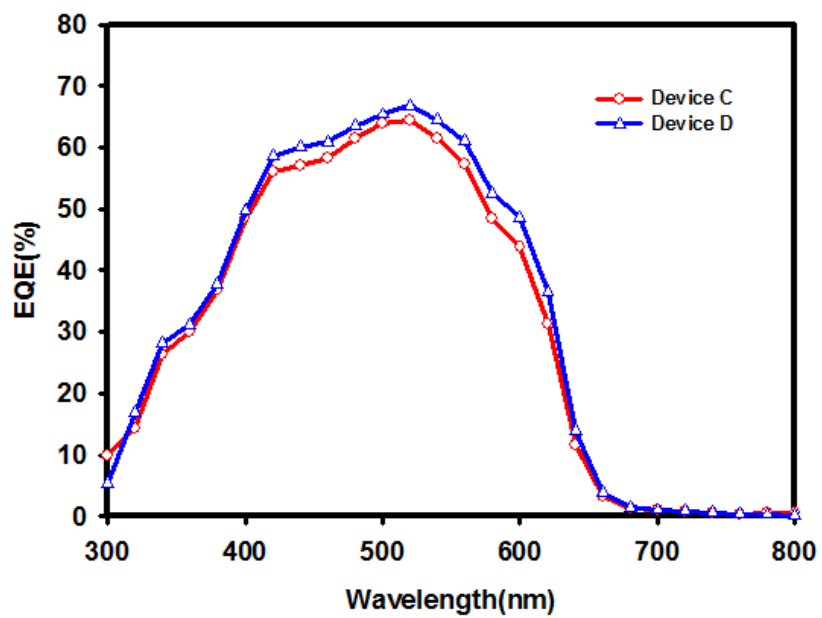

Fig. S3 EQE spectrum of Device C and Device D

10

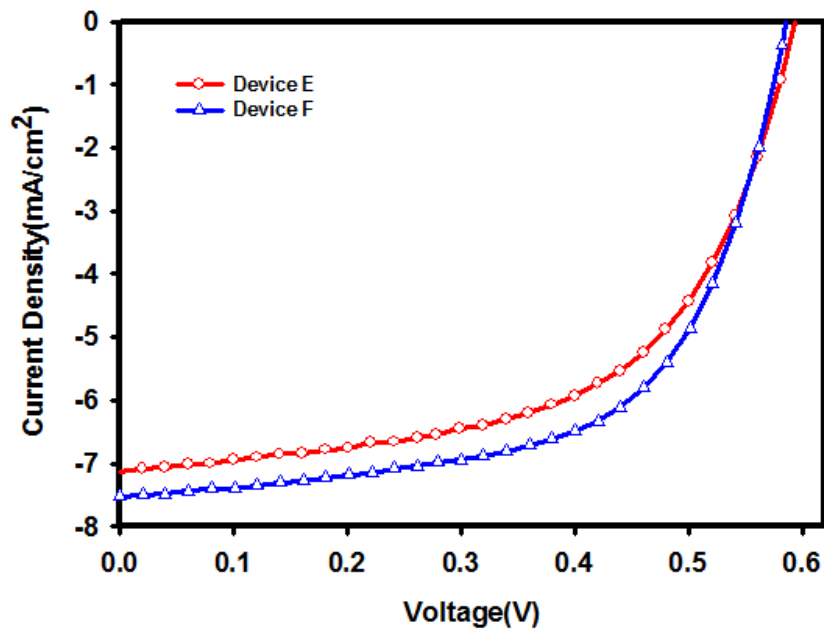

Fig. S4 Current Density vs. Voltage characteristics of the following devices:

Device E: Glass/ITO/ZnO(~30nm)/P3HT:PCBM(~120nm)/MoO<sub>3</sub>(10nm)/Al(100nm);

Device F: Glass/ITO/ZnO(~30nm)/P3HT:PCBM (~120nm)/WO<sub>3</sub> (5nm)/Al (100nm)

5

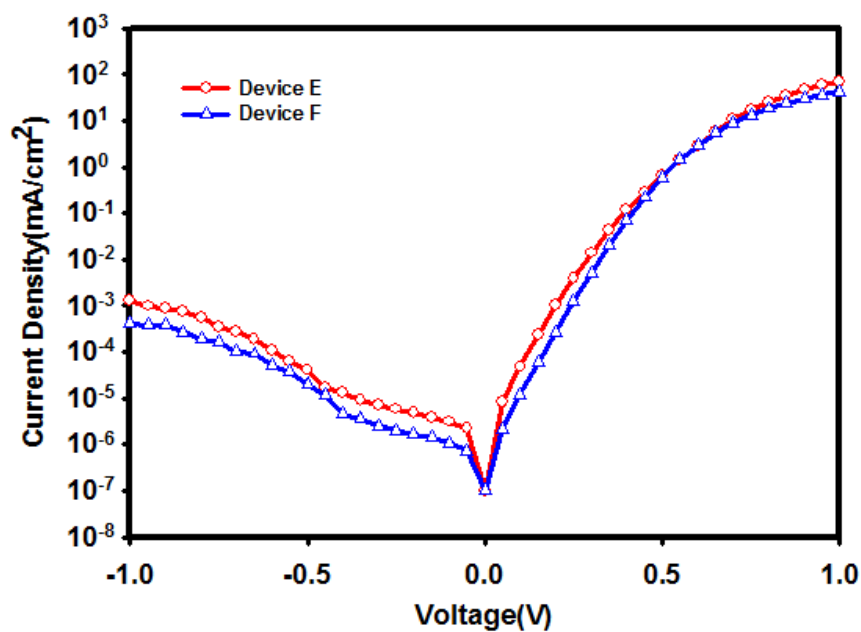

Fig. S5 Dark Current Density vs. Voltage characteristics of Device E and Device F
